# Supplementary material for: Integration of UPLC-MS and Quantitative Proteomics Reveals Key Bioactive Components and Osteoactive Targets of Liuwei Dihuang Wan in Bone Metabolism Modulation
Source: Research Square preprint supplement (doi:10.21203/rs.3.rs-6396213/v1), 2025-06-03
Supplement: Supplementary file 1 [file 23159e5e1c8ca55d390ad800.xlsx]

## Sheet: Sheet1
Normalize Time: 43:45:39
Time (Hour)	Time (hh:mm:ss)	Y (A9,A10)	Y (B9,B10)	Y (C9,C10)	Y (D9,D10)	Y (E9,E10)	Y (F9,F10)	Y (G9,G10)	Y (H9,H10)
0	00:00:00	0	0	0	0	0	0	0	0
0.972778	00:58:22	0.0733	0.064	0.0641	0.0586	0.0578	0.0611	0.063	0.0673
1.13972	01:08:23	0.0785	0.078	0.0844	0.0829	0.0815	0.0834	0.0793	0.0771
1.64	01:38:24	0.0987	0.1005	0.1095	0.1112	0.1112	0.1096	0.1075	0.1031
2.14	02:08:24	0.1082	0.1113	0.1211	0.1226	0.1233	0.1214	0.1207	0.1133
2.64056	02:38:26	0.1152	0.1184	0.1287	0.1304	0.1312	0.1284	0.1275	0.1186
3.14056	03:08:26	0.1193	0.1232	0.1342	0.1359	0.1373	0.1353	0.1324	0.1228
3.64056	03:38:26	0.1225	0.1272	0.1386	0.1395	0.1419	0.1403	0.1385	0.1268
4.14056	04:08:26	0.1268	0.1319	0.1418	0.1448	0.1465	0.145	0.1448	0.1307
4.64056	04:38:26	0.1315	0.1343	0.1469	0.1476	0.1513	0.1496	0.1497	0.1335
5.14056	05:08:26	0.1365	0.1385	0.1514	0.1532	0.1553	0.1546	0.1545	0.138
5.64056	05:38:26	0.1427	0.1454	0.159	0.1598	0.1622	0.1605	0.1622	0.1443
6.14056	06:08:26	0.1494	0.1504	0.1662	0.1666	0.1698	0.1674	0.1688	0.1521
6.64083	06:38:27	0.1562	0.1577	0.1724	0.1752	0.176	0.1734	0.1757	0.1587
7.14083	07:08:27	0.1625	0.165	0.1803	0.182	0.1848	0.1808	0.1845	0.1653
7.64111	07:38:28	0.1706	0.172	0.1881	0.1894	0.194	0.1881	0.1927	0.1724
8.14111	08:08:28	0.1783	0.1811	0.1959	0.1966	0.2009	0.1963	0.2008	0.1805
8.64111	08:38:28	0.1855	0.1876	0.2037	0.204	0.2088	0.2035	0.2078	0.1886
9.14139	09:08:29	0.1918	0.1937	0.2101	0.2103	0.2146	0.2104	0.2147	0.1939
9.64139	09:38:29	0.1975	0.1996	0.2174	0.2165	0.2201	0.2158	0.2206	0.2013
10.1414	10:08:29	0.2036	0.2052	0.2233	0.2214	0.2266	0.2208	0.2269	0.2066
10.6414	10:38:29	0.2102	0.2102	0.2282	0.2277	0.2327	0.2273	0.2335	0.2114
11.1417	11:08:30	0.2156	0.2156	0.2348	0.2343	0.2375	0.2335	0.2407	0.2171
11.6417	11:38:30	0.2205	0.2213	0.2408	0.2395	0.241	0.2398	0.2471	0.2219
12.1417	12:08:30	0.2251	0.2267	0.2455	0.2468	0.2488	0.2456	0.2522	0.2274
12.6417	12:38:30	0.2327	0.2319	0.2528	0.2537	0.2533	0.2503	0.258	0.2346
13.1417	13:08:30	0.2383	0.2376	0.2584	0.2592	0.2597	0.2575	0.2643	0.2408
13.6417	13:38:30	0.2428	0.2426	0.2645	0.2643	0.2666	0.2633	0.268	0.2465
14.1417	14:08:30	0.2472	0.248	0.2701	0.2707	0.2717	0.2694	0.2741	0.2519
14.6419	14:38:31	0.2524	0.2534	0.275	0.2757	0.2768	0.2747	0.2802	0.2573
15.1419	15:08:31	0.2592	0.2588	0.2809	0.2793	0.2819	0.2806	0.2863	0.2628
15.8086	15:48:31	0.264	0.263	0.2878	0.2862	0.2899	0.2869	0.2908	0.2689
16.3089	16:18:32	0.2673	0.2683	0.2918	0.2935	0.293	0.2926	0.2953	0.2721
16.8089	16:48:32	0.2741	0.275	0.2951	0.2971	0.3009	0.2972	0.3005	0.2785
17.3092	17:18:33	0.2792	0.2799	0.3033	0.3015	0.3073	0.3026	0.3049	0.2835
17.8092	17:48:33	0.2839	0.286	0.309	0.3079	0.3132	0.3087	0.3113	0.2895
18.3092	18:18:33	0.2882	0.2922	0.3137	0.3147	0.3186	0.3153	0.318	0.2935
18.8092	18:48:33	0.2945	0.297	0.3182	0.3185	0.324	0.3213	0.326	0.2988
19.3092	19:18:33	0.2983	0.3031	0.3239	0.3274	0.329	0.3266	0.3312	0.3035
19.8094	19:48:34	0.3026	0.309	0.3315	0.3338	0.3339	0.3335	0.3378	0.3105
20.3092	20:18:33	0.3095	0.3146	0.3391	0.3388	0.3393	0.3408	0.344	0.3188
20.8092	20:48:33	0.3153	0.3204	0.3431	0.3458	0.3451	0.3456	0.3491	0.3249
21.3092	21:18:33	0.321	0.3276	0.3491	0.3524	0.3539	0.3524	0.3549	0.3306
21.8094	21:48:34	0.3273	0.3326	0.3568	0.3608	0.3614	0.3594	0.3639	0.3368
22.3097	22:18:35	0.3329	0.339	0.3631	0.367	0.3681	0.3662	0.3697	0.3426
22.8097	22:48:35	0.3399	0.3477	0.372	0.3744	0.377	0.3739	0.3777	0.3506
23.3097	23:18:35	0.3477	0.3561	0.3816	0.3835	0.3829	0.3834	0.388	0.3577
23.8103	23:48:37	0.3565	0.3653	0.3899	0.3928	0.3923	0.3914	0.3966	0.3641
24.3103	24:18:37	0.3642	0.3732	0.3983	0.3999	0.3996	0.3993	0.4057	0.3734
24.8106	24:48:38	0.3736	0.3808	0.4062	0.4078	0.4066	0.4066	0.4125	0.3807
25.3106	25:18:38	0.383	0.3892	0.4152	0.4158	0.4161	0.4169	0.4205	0.3873
25.8106	25:48:38	0.3895	0.3985	0.4266	0.4255	0.4265	0.4272	0.4269	0.3964
26.3106	26:18:38	0.3999	0.408	0.4352	0.4351	0.4353	0.4355	0.4373	0.4066
26.8106	26:48:38	0.4073	0.4179	0.4433	0.4445	0.4445	0.4468	0.4466	0.4166
27.3106	27:18:38	0.4179	0.4284	0.4538	0.455	0.455	0.4565	0.4562	0.4252
27.8108	27:48:39	0.4295	0.4364	0.4642	0.4666	0.4652	0.4671	0.4666	0.4388
28.3108	28:18:39	0.4408	0.4462	0.4754	0.4797	0.4777	0.4788	0.4784	0.4479
28.8111	28:48:40	0.4499	0.4582	0.4875	0.4914	0.4878	0.4904	0.4914	0.4584
29.3111	29:18:40	0.4599	0.4691	0.498	0.5009	0.4999	0.5033	0.5017	0.4677
29.8111	29:48:40	0.4708	0.4796	0.5099	0.5131	0.5109	0.5122	0.5138	0.4805
30.3117	30:18:42	0.4831	0.4909	0.5228	0.5245	0.523	0.5264	0.5262	0.4907
30.8111	30:48:40	0.4955	0.5015	0.5335	0.5371	0.5342	0.5385	0.5324	0.5015
31.3114	31:18:41	0.5093	0.5124	0.5471	0.5494	0.5486	0.5531	0.5457	0.5157
31.8114	31:48:41	0.5206	0.5274	0.5613	0.5592	0.5619	0.5671	0.5595	0.528
32.3114	32:18:41	0.5347	0.5386	0.5746	0.5739	0.5719	0.582	0.5709	0.5418
32.8114	32:48:41	0.548	0.5534	0.5868	0.5872	0.587	0.5917	0.584	0.5567
33.4781	33:28:41	0.5637	0.5784	0.6079	0.6045	0.6062	0.6126	0.6055	0.577
33.9781	33:58:41	0.5795	0.5928	0.6264	0.62	0.6203	0.6278	0.6195	0.5916
34.4781	34:28:41	0.5929	0.6058	0.6423	0.6371	0.638	0.6447	0.6353	0.6064
34.9781	34:58:41	0.6074	0.6202	0.6535	0.6549	0.6546	0.6563	0.6489	0.621
35.4781	35:28:41	0.6246	0.6398	0.6706	0.6692	0.6714	0.6749	0.6676	0.6379
35.9783	35:58:42	0.6407	0.6572	0.6841	0.6862	0.6891	0.6915	0.6873	0.6548
36.4786	36:28:43	0.6551	0.672	0.7039	0.7024	0.7081	0.7108	0.7062	0.6695
36.9786	36:58:43	0.6722	0.6883	0.7221	0.7225	0.7241	0.7268	0.7239	0.6861
37.4786	37:28:43	0.6884	0.7043	0.7353	0.7364	0.7406	0.7463	0.7405	0.7075
37.9789	37:58:44	0.7054	0.7248	0.7553	0.7576	0.7586	0.7647	0.7614	0.7228
38.4789	38:28:44	0.7247	0.7451	0.776	0.7752	0.7786	0.7817	0.7817	0.7412
38.9792	38:58:45	0.7416	0.7632	0.7921	0.7973	0.7963	0.8011	0.8032	0.7583
39.4792	39:28:45	0.7604	0.7813	0.811	0.8152	0.8148	0.8189	0.8227	0.7786
39.9792	39:58:45	0.7812	0.7974	0.8325	0.8385	0.8345	0.8407	0.8408	0.7959
40.4792	40:28:45	0.8008	0.821	0.8535	0.8574	0.8542	0.8632	0.8617	0.8152
40.9792	40:58:45	0.816	0.8364	0.8703	0.8784	0.8743	0.8805	0.8822	0.8344
41.4792	41:28:45	0.833	0.858	0.8894	0.8973	0.8941	0.9015	0.9026	0.855
41.9792	41:58:45	0.8511	0.8824	0.9112	0.9164	0.9189	0.922	0.9254	0.8773
42.4792	42:28:45	0.8705	0.9002	0.9307	0.9385	0.9398	0.9448	0.9442	0.8985
42.9792	42:58:45	0.8938	0.9255	0.9496	0.9571	0.9632	0.9652	0.9655	0.92
43.6319	43:37:55	1.0486	0.9989	1.0008	0.9995	1.005	1.0164	1.0256	1.0164
43.9281	43:55:41	1.0385	0.9966	0.9996	0.994	0.9939	0.9896	0.9911	1.0077
44.4306	44:25:50	1.0525	1.0508	1.0919	1.1047	1.1206	1.1263	1.1393	1.1363
44.9333	44:56:00	1.0397	1.0657	1.1266	1.1472	1.1749	1.1805	1.1941	1.1726
45.4353	45:26:07	1.0457	1.0617	1.1194	1.1429	1.176	1.1868	1.1983	1.1763
45.9381	45:56:17	1.0553	1.0723	1.1184	1.1487	1.1806	1.1921	1.2002	1.18
46.5733	46:34:24	1.0536	1.0746	1.1236	1.1436	1.1888	1.1877	1.1983	1.1748
47.0736	47:04:25	1.0395	1.0765	1.1245	1.1428	1.1864	1.1829	1.1865	1.1674
47.5739	47:34:26	1.0354	1.0874	1.1344	1.1469	1.1892	1.1909	1.1872	1.1753
48.0742	48:04:27	1.046	1.1088	1.1441	1.1583	1.2025	1.201	1.1996	1.1865
48.5744	48:34:28	1.0569	1.1356	1.168	1.1726	1.2174	1.214	1.2085	1.1997
49.0747	49:04:29	1.0672	1.1534	1.1801	1.1872	1.2276	1.2221	1.2136	1.201
49.575	49:34:30	1.0752	1.1776	1.1941	1.2001	1.2415	1.2302	1.2139	1.198
50.0753	50:04:31	1.089	1.1974	1.2022	1.2085	1.2621	1.2409	1.218	1.2038
50.5756	50:34:32	1.09	1.2259	1.2233	1.2253	1.2849	1.254	1.2396	1.225
51.0758	51:04:33	1.1102	1.2448	1.2422	1.2409	1.2992	1.2652	1.2541	1.238
51.5761	51:34:34	1.1233	1.2679	1.2687	1.262	1.3191	1.2813	1.2777	1.2602
52.0764	52:04:35	1.1365	1.3015	1.2922	1.2896	1.3411	1.3024	1.3059	1.2874
52.5767	52:34:36	1.1396	1.3302	1.3156	1.314	1.3677	1.3206	1.3299	1.3168
53.0769	53:04:37	1.1513	1.3599	1.3447	1.3383	1.3882	1.3507	1.3505	1.3435
53.5772	53:34:38	1.155	1.385	1.3704	1.3681	1.4102	1.3674	1.3803	1.3724
54.0775	54:04:39	1.1602	1.4196	1.3913	1.3961	1.4411	1.3946	1.4075	1.4015
54.5775	54:34:39	1.1651	1.4493	1.4168	1.4165	1.4595	1.4159	1.4268	1.4237
55.0778	55:04:40	1.1812	1.478	1.4371	1.4347	1.4821	1.436	1.4533	1.4438
55.5781	55:34:41	1.1929	1.5044	1.4523	1.4457	1.4964	1.4511	1.4717	1.4597
56.0786	56:04:43	1.2101	1.5177	1.4643	1.4524	1.4949	1.4547	1.4813	1.4655
56.5789	56:34:44	1.2327	1.5157	1.4588	1.4449	1.4753	1.4479	1.4824	1.4561
57.0792	57:04:45	1.2492	1.5159	1.4558	1.4359	1.465	1.4377	1.4728	1.4502
57.5794	57:34:46	1.2693	1.521	1.4468	1.4259	1.453	1.4258	1.4674	1.4354
58.0797	58:04:47	1.2899	1.5251	1.4417	1.4303	1.453	1.4217	1.461	1.4365
58.58	58:34:48	1.3014	1.5336	1.442	1.4253	1.4727	1.4352	1.4757	1.4579
59.0803	59:04:49	1.3159	1.5509	1.4668	1.4514	1.4807	1.4579	1.4897	1.4824
59.5806	59:34:50	1.3294	1.5806	1.4939	1.4674	1.5048	1.4775	1.5163	1.5053
60.0808	60:04:51	1.3346	1.6059	1.5306	1.4979	1.5311	1.4959	1.5483	1.5423
60.5814	60:34:53	1.3543	1.6379	1.5725	1.5298	1.5704	1.5353	1.5905	1.5728
61.0817	61:04:54	1.3761	1.6792	1.6009	1.5653	1.6124	1.574	1.6367	1.6016
61.5819	61:34:55	1.387	1.7202	1.6425	1.6058	1.6423	1.6172	1.6835	1.648
62.0825	62:04:57	1.4046	1.7643	1.6927	1.6532	1.6805	1.662	1.7259	1.704
62.8331	62:49:59	1.4451	1.8364	1.756	1.7297	1.7403	1.7235	1.7999	1.7796
63.3333	63:20:00	1.4653	1.8861	1.8103	1.7685	1.7776	1.7745	1.8506	1.8185
63.8336	63:50:01	1.4861	1.9296	1.8475	1.8	1.8123	1.8095	1.9023	1.8562
64.3339	64:20:02	1.5079	1.9769	1.8929	1.8489	1.8423	1.8494	1.9557	1.8978
64.8342	64:50:03	1.5193	2.0317	1.9389	1.8961	1.8931	1.8995	2.0038	1.9521
65.3344	65:20:04	1.5311	2.0961	1.9757	1.9207	1.9277	1.9392	2.0577	1.9997
65.8347	65:50:05	1.5583	2.1335	2.0081	1.9466	1.9475	1.9642	2.0999	2.0182
66.335	66:20:06	1.5841	2.189	2.0439	1.9867	1.9746	1.9922	2.1352	2.0541
66.8356	66:50:08	1.6055	2.2029	2.0888	2.027	2.0092	2.0262	2.1774	2.0919
67.3358	67:20:09	1.6302	2.2582	2.1348	2.0713	2.0542	2.0744	2.218	2.1566
67.8361	67:50:10	1.6323	2.3277	2.1709	2.0983	2.0989	2.1132	2.2506	2.2255
68.3367	68:20:12	1.6649	2.3598	2.2061	2.135	2.1402	2.1517	2.2854	2.2566
68.8369	68:50:13	1.6774	2.4113	2.2509	2.1734	2.1742	2.1823	2.3357	2.2666
69.3372	69:20:14	1.7012	2.4553	2.3156	2.2141	2.2177	2.2239	2.3716	2.3493
69.8375	69:50:15	1.7142	2.4942	2.3529	2.2826	2.2541	2.2721	2.4059	2.4376
70.3378	70:20:16	1.7297	2.5396	2.3861	2.3306	2.3053	2.3293	2.4642	2.504
70.8383	70:50:18	1.7581	2.595	2.4408	2.3625	2.3447	2.3686	2.5009	2.5422
71.3386	71:20:19	1.7791	2.6304	2.4845	2.407	2.4106	2.4252	2.5671	2.6834
71.8389	71:50:20	1.8018	2.6841	2.5297	2.4684	2.4354	2.4691	2.5968	2.6903
72.3392	72:20:21	1.8167	2.7	2.5917	2.5096	2.4906	2.5258	2.6353	2.7457
72.8394	72:50:22	1.8404	2.7631	2.6374	2.5786	2.5278	2.5767	2.6971	2.8051
73.3394	73:20:22	1.8574	2.765	2.6834	2.6137	2.5746	2.6118	2.741	2.798
73.8397	73:50:23	1.8829	2.802	2.7375	2.6553	2.6276	2.6492	2.7798	2.7973
74.34	74:20:24	1.9095	2.8364	2.7832	2.7196	2.6731	2.6952	2.8231	2.8655
74.8406	74:50:26	1.9295	2.8505	2.8344	2.7762	2.7255	2.7518	2.8652	2.9031
75.3408	75:20:27	1.9505	2.8444	2.8868	2.8254	2.749	2.8121	2.9119	2.9054
75.8411	75:50:28	1.9745	2.8674	2.9359	2.8784	2.7837	2.8442	2.9672	2.9399
76.3414	76:20:29	2.0012	2.9008	2.9768	2.9183	2.8362	2.8772	3.0004	2.9485
76.8417	76:50:30	2.0305	2.913	3.0089	2.9589	2.8851	2.9092	3.0379	2.9362
77.3417	77:20:30	2.0553	2.9386	3.0543	3.0116	2.9225	2.9703	3.08	2.9425
77.8419	77:50:31	2.0815	2.9465	3.09	3.0445	2.9562	2.9935	3.1256	2.9622
78.3425	78:20:33	2.109	2.9519	3.1591	3.0902	2.9979	3.0071	3.1743	2.9832
78.8428	78:50:34	2.1445	2.9633	3.1946	3.1416	3.037	3.0466	3.2189	2.9948
79.3431	79:20:35	2.1701	2.9813	3.2379	3.1756	3.0699	3.0851	3.2513	2.9913
79.8433	79:50:36	2.1896	3	3.2868	3.1986	3.102	3.1277	3.2908	2.9871
80.3436	80:20:37	2.214	3.0053	3.3432	3.2394	3.1387	3.1624	3.3195	3.0158
80.8439	80:50:38	2.2416	3.0317	3.3949	3.2897	3.1869	3.2176	3.3569	3.0021
81.3442	81:20:39	2.2685	3.0478	3.42	3.299	3.214	3.2477	3.39	3.0232
81.8444	81:50:40	2.3032	3.0532	3.473	3.3508	3.2406	3.2718	3.4269	3.0136
82.3447	82:20:41	2.3179	3.0835	3.501	3.3611	3.2789	3.3053	3.4645	3.0672
82.845	82:50:42	2.3533	3.1081	3.5453	3.4075	3.3043	3.3531	3.4908	2.8969
83.345	83:20:42	2.3777	3.1338	3.5732	3.4546	3.348	3.3936	3.5187	2.9756
83.8453	83:50:43	2.3967	3.1513	3.5898	3.4829	3.3869	3.4301	3.5766	2.9482
84.3456	84:20:44	2.4218	3.1755	3.6349	3.4917	3.4242	3.4196	3.6088	2.8352
84.8458	84:50:45	2.4495	3.1977	3.6778	3.541	3.3666	3.4743	3.6433	2.7988
85.3461	85:20:46	2.4667	3.2356	3.707	3.5467	3.4179	3.5015	3.663	2.8044
85.8464	85:50:47	2.4962	3.2601	3.7113	3.5635	3.4332	3.489	3.7266	2.6869
86.3467	86:20:48	2.5151	3.2697	3.719	3.5673	3.4089	3.5724	3.7314	2.8323
86.8469	86:50:49	2.5294	3.3004	3.6564	3.5727	3.4092	3.5612	3.7516	2.6771
87.3475	87:20:51	2.5527	3.2948	3.6475	3.5419	3.3822	3.5584	3.7808	2.7289
87.8478	87:50:52	2.5648	3.293	3.5901	3.5073	3.3337	3.5145	3.7855	2.69
88.3481	88:20:53	2.581	3.2637	3.5595	3.4878	3.2674	3.4696	3.9496	2.596
88.8486	88:50:55	2.5967	3.269	3.4711	3.4269	3.218	3.4233	3.804	2.7073
89.3486	89:20:55	2.6143	3.201	3.3974	3.381	3.1656	3.3242	3.7925	2.6357
89.8486	89:50:55	2.616	3.1751	3.2724	3.3503	3.1036	3.3057	3.7485	2.7352
90.3489	90:20:56	2.635	3.0927	3.1418	3.2837	3.0724	3.2299	3.713	2.64
