# Supplementary material for: Integration of UPLC-MS and Quantitative Proteomics Reveals Key Bioactive Components and Osteoactive Targets of Liuwei Dihuang Wan in Bone Metabolism Modulation
Source: Research Square preprint supplement (doi:10.21203/rs.3.rs-6396213/v1), 2025-06-03
Supplement: Supplementary file 4 [file 97358589c253c8fb21aaf167.xlsx]

## Sheet: Sheet1
	case group(pg/ml)	control group(pg/ml)
CTX	7.48673	29.3134
	8.95693	24.3972
	5.86119	21.9861
	10.2913	36.9944
	9.48685	34.746
	11.0145	27.2685
	22.114	27.8343
	14.5906	17.8487
	16.9448	29.0398
	15.9588	16.1033
	12.3523	17.7397
	17.0201	11.6417
P1NP	972.991	344.911
	966.771	389.359
	931.416	375.804
	416.454	453.468
	380.734	488.2
	422.614	459.654
	488.2	444.818
	526.983	454.705
	523.211	468.325
	539.586	573.879
	495.676	553.508
	564.949	576.436
