# Supplementary material for: Integration of UPLC-MS and Quantitative Proteomics Reveals Key Bioactive Components and Osteoactive Targets of Liuwei Dihuang Wan in Bone Metabolism Modulation
Source: Research Square preprint supplement (doi:10.21203/rs.3.rs-6396213/v1), 2025-06-03
Supplement: Supplementary file 5 [file 9b9ea1646604e8c0efddf817.xlsx]

## Sheet: Sheet1
Protein accession	Protein description	Experiment/Control Ratio	Regulated Type	Experiment/Control P value	Gene name	MW [kDa]	Score	Coverage [%]	Peptides	PSMs	Unique peptides	Control-1	Control-2	Control-3	Experiment -1	Experiment -2	Experiment -3	Subcellular location	Biological Process	Cellular Component	Molecular Function	KEGG category	KEGG description	KEGG pathway	Pfam ID	Pfam description	eggNOG category	eggNOG ID	eggNOG desction
P63018	Heat shock cognate 71 kDa protein	0.741	Down	1.78164e-05	Hspa8	70.87	207.88	35	20	32	17	1.143	1.149	1.157	0.853	0.834	0.868	vacuolar membrane; cytoplasm; extracellular region; plasma membrane; cytoskeleton	protein targeting to vacuole involved in autophagy; phosphorylation; catabolic process; regulation of striated muscle cell apoptotic process; positive regulation of biological process; intracellular protein transport; nervous system process; reproduction; negative regulation of muscle cell apoptotic process; microtubule-based process; response to topologically incorrect protein; negative regulati…	synaptic membrane; vacuolar lumen; lytic vacuole membrane; supramolecular fiber; organelle lumen; extracellular organelle; exocytic vesicle; cytosol; protein-containing complex; ribonucleoprotein complex; cell junction; intracellular vesicle; endosome; axon terminus; endomembrane system; axon; membrane microdomain; lysosome; nuclear protein-containing complex; intracellular anatomical structure; …	anion binding; signaling receptor binding; purine ribonucleotide binding; ATPase; organic cyclic compound binding; hydrolase activity; small molecule binding; purine nucleotide binding; enzyme binding; fatty acid derivative binding; adenosine receptor binding; nucleic acid binding; adenyl ribonucleotide binding; ion binding; G protein-coupled receptor binding; hydrolase activity, acting on acid a…	K03283	HSPA1s; heat shock 70kDa protein 1/2/6/8	rno03040 Spliceosome; rno05020 Prion disease; rno05134 Legionellosis; rno04144 Endocytosis; rno04141 Protein processing in endoplasmic reticulum; rno04612 Antigen processing and presentation; rno04915 Estrogen signaling pathway; rno05145 Toxoplasmosis; rno04213 Longevity regulating pathway - multiple species; rno05417 Lipid and atherosclerosis; rno05162 Measles; rno04010 MAPK signaling pathway	PF00012	Hsp70 protein	O	KOG0101	ATP binding
Q62636	Ras-related protein Rap-1b	0.748	Down	0.0019838	Rap1b	20.798	273.18	59.8	9	15	9	1.118	1.124	1.164	0.818	0.814	0.916	cytoplasm	cellular response to organic cyclic compound; regulation of vesicle-mediated transport; epithelium development; cell differentiation; biological regulation; response to hormone; cellular response to organonitrogen compound; positive regulation of cellular component organization; positive regulation of response to stimulus; response to endogenous stimulus; cellular response to organic substance; r…	cell junction; anchoring junction; cellular anatomical entity; cell periphery; cytoplasm; intracellular non-membrane-bounded organelle; membrane; organelle; intracellular organelle; non-membrane-bounded organelle; intracellular anatomical structure	purine nucleotide binding; small molecule binding; catalytic activity; purine ribonucleoside triphosphate binding; carbohydrate derivative binding; hydrolase activity; organic cyclic compound binding; heterocyclic compound binding; GTPase activity; guanyl nucleotide binding; nucleotide binding; anion binding; hydrolase activity, acting on acid anhydrides, in phosphorus-containing anhydrides; guan…	K07836	RAP1B; Ras-related protein Rap-1B	rno04015 Rap1 signaling pathway; rno04720 Long-term potentiation; rno04934 Cushing syndrome; rno04972 Pancreatic secretion; rno05211 Renal cell carcinoma; rno04024 cAMP signaling pathway; rno04722 Neurotrophin signaling pathway; rno04014 Ras signaling pathway; rno05417 Lipid and atherosclerosis; rno04010 MAPK signaling pathway; rno04510 Focal adhesion; rno04062 Chemokine signaling pathway; rno046…	PF00071	Ras family	G	KOG0395	GTPase activity
Q9WUD9	Proto-oncogene tyrosine-protein kinase Src	0.702	Down	0.000199129	Src	59.972	36.755	8.4	5	5	5	1.108	1.199	1.174	0.832	0.817	0.795	mitochondrion; cytoskeleton; plasma membrane; cytoplasm	positive regulation of transferase activity; response to fluid shear stress; regulation of transcription, DNA-templated; system process; G protein-coupled receptor signaling pathway; positive regulation of protein metabolic process; regulation of epithelial cell migration; heart process; positive regulation of cellular metabolic process; mammary gland duct morphogenesis; hormone-mediated signalin…	extrinsic component of plasma membrane; nuclear lumen; intracellular non-membrane-bounded organelle; membrane; vacuole; polymeric cytoskeletal fiber; organelle; synapse; intracellular membrane-bounded organelle; non-membrane-bounded organelle; intracellular anatomical structure; asymmetric synapse; endomembrane system; mitochondrion; ruffle; endosome; envelope; organelle lumen; organelle inner me…	phosphotransferase activity, alcohol group as acceptor; binding; transmembrane signaling receptor activity; tetrapyrrole binding; receptor serine/threonine kinase binding; small molecule binding; protein kinase binding; purine nucleotide binding; transferase activity; signaling receptor binding; anion binding; transmembrane receptor protein serine/threonine kinase binding; ribonucleotide binding;…	K05704	SRC; tyrosine-protein kinase Src [EC:2.7.10.2]	rno04915 Estrogen signaling pathway; rno05163 Human cytomegalovirus infection; rno04611 Platelet activation; rno04613 Neutrophil extracellular trap formation; rno04810 Regulation of actin cytoskeleton; rno04360 Axon guidance; rno05417 Lipid and atherosclerosis; rno01521 EGFR tyrosine kinase inhibitor resistance; rno04727 GABAergic synapse; rno04370 VEGF signaling pathway; rno04012 ErbB signaling …	PF07714; PF00017; PF00018	Protein tyrosine and serine/threonine kinase; SH2 domain; SH3 domain	T	KOG0197	peptidyl-tyrosine autophosphorylation
G3V852	RCG55135, isoform CRA_b	0.632	Down	1.4644e-09	Tln1	269.67	323.31	49.2	97	153	97	1.23	1.234	1.234	0.777	0.782	0.779		cytoskeleton organization; cell surface receptor signaling pathway; actin filament-based process; protein-containing complex subunit organization; actin cytoskeleton organization; cellular component biogenesis; cellular component assembly; regulation of biological process; cell-substrate junction organization; signaling; cortical cytoskeleton organization; cell junction assembly; biological adhes…	anchoring junction; plasma membrane bounded cell projection; organelle; cell periphery; intracellular organelle; cell projection; cell-substrate junction; intracellular non-membrane-bounded organelle; membrane; cell leading edge; cellular anatomical entity; non-membrane-bounded organelle; intracellular anatomical structure; cell junction; cell-cell junction	protein domain specific binding; binding; lipid binding; structural molecule activity; signaling receptor binding; cell adhesion molecule binding; protein binding; actin binding; cytoskeletal protein binding; phospholipid binding; protein-containing complex binding; modified amino acid binding	K06271	TLN; talin	rno05166 Human T-cell leukemia virus 1 infection; rno04510 Focal adhesion; rno04015 Rap1 signaling pathway; rno04611 Platelet activation	PF16511; PF00373; PF01608; PF09141; PF08913	N-terminal or F0 domain of Talin-head FERM; FERM central domain; I/LWEQ domain; Talin, middle domain; Vinculin Binding Site	O	KOG4261	cytoskeletal anchoring at plasma membrane
P35213	14-3-3 protein beta/alpha	0.603	Down	0.0097979	Ywhab	28.054	7.7745	25.6	7	12	1	1.307	1.252	1.194	0.914	0.717	0.631	cytoplasm	maintenance of protein location; regulation of cellular process; cellular process; negative regulation of phosphorus metabolic process; regulation of molecular function; negative regulation of dephosphorylation; regulation of dephosphorylation; regulation of metabolic process; regulation of cellular metabolic process; regulation of cellular protein metabolic process; regulation of primary metabol…	intracellular membrane-bounded organelle; intracellular anatomical structure; cellular anatomical entity; cytoplasmic vesicle; transcription regulator complex; cytoplasm; membrane-bounded organelle; intracellular vesicle; vesicle; intracellular organelle; organelle; pigment granule; protein-containing complex	protein kinase regulator activity; enzyme inhibitor activity; kinase regulator activity; protein binding; kinase inhibitor activity; protein phosphorylated amino acid binding; phosphoprotein binding; enzyme binding; binding	K16197	YWHAB_Q_Z; 14-3-3 protein beta/theta/zeta	rno04151 PI3K-Akt signaling pathway; rno04114 Oocyte meiosis; rno05161 Hepatitis B; rno04390 Hippo signaling pathway; rno05203 Viral carcinogenesis; rno04110 Cell cycle; rno05160 Hepatitis C	PF00244	14-3-3 protein	T	KOG0841	protein domain specific binding
P41499	Tyrosine-protein phosphatase non-receptor type 11	0.745	Down	0.034804	Ptpn11	68.032	31.376	7.6	5	5	5	1.153	1.143	1.135	0.867	0.763	0.926	plasma membrane; cytoplasm	regulation of protein serine/threonine kinase activity; positive regulation of phosphate metabolic process; brain development; cellular response to abiotic stimulus; cell projection organization; regulation of developmental process; mitotic cell cycle; developmental growth; positive regulation of cellular component organization; positive regulation of response to stimulus; megakaryocyte different…	membrane; membrane raft; organelle; intracellular membrane-bounded organelle; intracellular anatomical structure; membrane microdomain; plasma membrane; plasma membrane region; cellular anatomical entity; cell periphery; cytoplasm; intracellular organelle; membrane-bounded organelle	signaling adaptor activity; enzyme binding; protein kinase binding; protein phosphorylated amino acid binding; hydrolase activity; signaling receptor binding; cell adhesion molecule binding; phosphatase activity; phosphoprotein phosphatase activity; dopamine receptor binding; binding; protein binding; phosphoric ester hydrolase activity; G protein-coupled receptor binding; kinase binding; molecul…	K07293	PTPN11; tyrosine-protein phosphatase non-receptor type 11 [EC:3.1.3.48]	rno04670 Leukocyte transendothelial migration; rno04931 Insulin resistance; rno04360 Axon guidance; rno05235 PD-L1 expression and PD-1 checkpoint pathway in cancer; rno04072 Phospholipase D signaling pathway; rno05168 Herpes simplex virus 1 infection; rno04014 Ras signaling pathway; rno05211 Renal cell carcinoma; rno04722 Neurotrophin signaling pathway; rno04625 C-type lectin receptor signaling p…	PF00017; PF00102	SH2 domain; Protein-tyrosine phosphatase	T	KOG0790	abortive mitotic cell cycle
